# Supplementary material for: Reconstructing Druze population history
Source: PubMed Central journal article supplement (PMC5111078; doi:10.1038/srep35837), 2016-11-16
Supplement: srep35837-s1.pdf [file srep35837-s1.pdf]

Supplementary materials

**Reconstructing Druze population history**

Scarlett Marshall<sup>1</sup>, Ranajit Das<sup>2</sup>, Mehdi Pirooznia<sup>3</sup> and Eran Elhaik<sup>4\*</sup>

<sup>1</sup> An independent researcher

<sup>2</sup> Manipal Centre for Natural Sciences (MCNS), Manipal University, Manipal,  
Karnataka, India

<sup>3</sup> Johns Hopkins University, Department of Psychiatry and Behavioral Sciences,  
Baltimore, MD, USA 21205

<sup>4</sup> University of Sheffield, Department of Animal and Plant Sciences, Sheffield, UK  
S10 2TN

**Figure S1**

**The genetic distances ( $d$ ) within each reference population.**

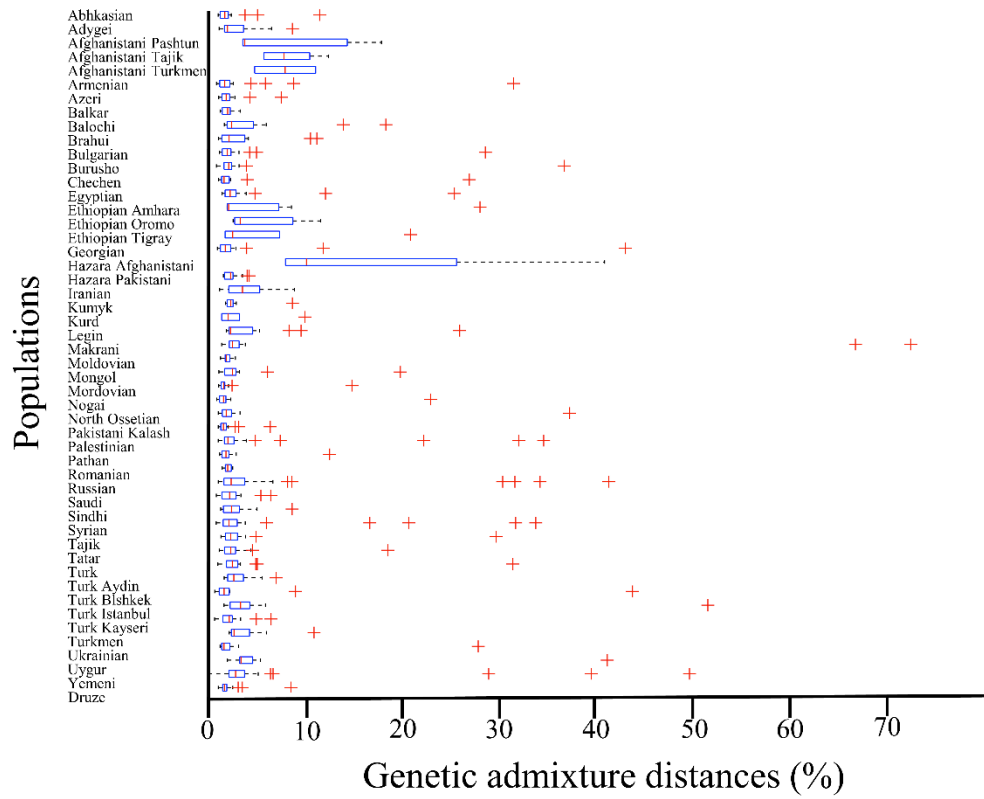

**Figure S2**

The genetic distances ( $d$ ) between Druze and other populations

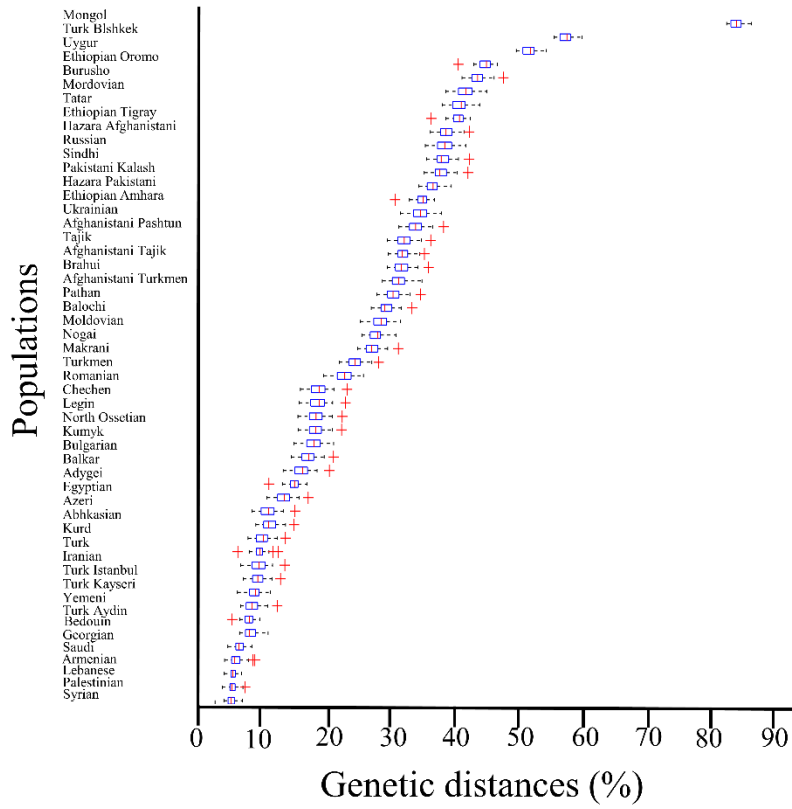

**Table S1**

Summary of reference populations, nicknames, sampling sites, sample sizes (*N*), geographic coordinates, and data sources used for each population

| Populations        | Nick | Countries and states/regions          | <i>N</i> | Latitude | Longitude | Sources    |
|--------------------|------|---------------------------------------|----------|----------|-----------|------------|
| Abkhazian          | AB   | Abkhazia                              | 27       | 42.97    | 41.44     | 65         |
| Afghan, Hazara     | AHAZ | Afghanistan, Hazarajat                | 5        | 36.89    | 73.26     | 62, 10, 25 |
| Afghan, Pashtun    | AFP  | Afghanistan                           | 5        | 36.89    | 73.26     | 25         |
| Afghan, Tadjik     | AFTA | Afghanistan                           | 5        | 36.89    | 73.26     | 25         |
| Afghan, Turkmen    | AFTU | Afghanistan                           | 4        | 36.89    | 73.26     | 25         |
| Armenian           | ARM  | Armenia                               | 35       | 40.08    | 45.02     | 65, 62     |
| Bedouins           | BDN  | Israel                                | 45       | 32.25    | 35        | 59         |
| Bulgarian          | BU   | Bulgaria                              | 28       | 42.41    | 23.19     | 65, 10     |
| Egyptian           | EG   | Egypt                                 | 27       | 26.82    | 30.8      | 17, 10     |
| Ethiopian, Amhara  | ETA  | Ethiopia                              | 7        | 9.145    | 40.49     | 17         |
| Ethiopian, Oromo   | ETO  | Ethiopia                              | 7        | 9.145    | 40.49     | 17         |
| Ethiopian, Tigray  | ETT  | Ethiopia                              | 5        | 9.145    | 40.49     | 17         |
| Georgian           | GO   | Georgia                               | 34       | 41.43    | 44.47     | 17, 62, 10 |
| Iranian            | IR   | Iran                                  | 36       | 32.42    | 53.68     | 17, 10     |
| Iranian, Azeri     | IAZ  | Iran, Azerbaijan                      | 16       | 48       | 38        | 62         |
| Kurd               | KR   | Kazakhstan                            | 6        | 36.72    | 42.45     | 65         |
| Lebanese           | LEB  | Lebanon                               | 30       | 33.85    | 35.86     | 17, 10     |
| Moldovian          | MOL  | Moldova                               | 7        | 28.12    | 47.68     | 62         |
| Mongolian          | MG   | Mongolia                              | 21       | 45       | 111       | 10, 59     |
| Pakistani, Balochi | PBA  | Pakistan, Balochistan                 | 25       | 30.18    | 67.01     | 59         |
| Pakistani, Brahui  | PBR  | Pakistan, Balochistan                 | 25       | 30.5     | 66.5      | 59         |
| Pakistani, Burusho | PBU  | Pakistan, Chitral, Khyber Pakhtunkhwa | 25       | 36.5     | 74        | 59         |
| Pakistani, Hazara  | PHAZ | Pakistan, Khyber Pakhtunkhwa          | 23       | 33.5     | 70        | 59         |
| Pakistani, Kalash  | PKA  | Pakistan, Chitral, Khyber Pakhtunkhwa | 25       | 27.83    | 68.77     | 59         |
| Pakistani, Makrani | PMA  | Pakistan, Makran, Balochistan         | 25       | 26       | 64        | 59         |
| Pakistani, Pathan  | PPA  | Pakistan                              | 23       | 33.5     | 70.5      | 59         |
| Pakistani, Sindhi  | PSI  | Pakistan, Sindh                       | 25       | 25.5     | 69        | 59         |
| Palestinian        | PAL  | Israel                                | 57       | 32.5     | 35        | 59, 62     |
| Romanian           | RO   | Romania                               | 15       | 44.8     | 26.06     | 10         |
| Russian, Adygei    | RAD  | Russia, Adygea                        | 17       | 44       | 29        | 59         |
| Russian, Balkar    | RB   | Russia, Balkar                        | 22       | 43.39    | 43.56     | 65,        |

|                         |     |                              |    |       |       |        |
|-------------------------|-----|------------------------------|----|-------|-------|--------|
|                         |     |                              |    |       |       | 62     |
| Russian, Chechen        | RC  | Russia, Chechnya             | 24 | 43.4  | 45.71 | 65, 10 |
| Russian, Kumyk          | RK  | Russia, Republic of Dagestan | 17 | 42.14 | 47.08 | 65, 62 |
| Russian, Lezgin         | ILZ | Russia, Republic of Dagestan | 21 | 42    | 47.96 | 17, 62 |
| Russian, Mordovian      | RMO | Russia, Mordvinia            | 15 | 54.23 | 44.06 | 65     |
| Russian, Moscow         | RM  | Russia, Moscow               | 39 | 55.75 | 37.62 | 62, 10 |
| Russian, Nogai          | RN  | Russia, Republic of Dagestan | 16 | 42.14 | 47.09 | 65     |
| Russian, North Ossetian | RNO | Russia, Ossetia (North)      | 18 | 43.04 | 44.28 | 65, 62 |
| Russian, Tatar          | RT  | Russia, Tatarstan            | 35 | 55.18 | 50.72 | 62, 10 |
| Saudi                   | SDI | Saudi Arabia                 | 20 | 23.88 | 45.07 | 17     |
| Syrian                  | SIN | Syria                        | 16 | 34.8  | 38.99 | 17     |
| Tajik                   | PT  | Tajikistan                   | 28 | 38.35 | 68.48 | 10, 65 |
| Turk                    | TUR | Turkey                       | 19 | 39    | 36    | 17     |
| Turk, Aydin             | TAY | Turkey                       | 20 | 37.29 | 28.61 | 64     |
| Turk, Bishkek           | TBI | Turkey                       | 16 | 41.20 | 74.77 | 64     |
| Turk, Istanbul          | TIS | Turkey                       | 20 | 41    | 28.98 | 64     |
| Turk, Kayseri           | TKA | Turkey                       | 23 | 38.51 | 33.38 | 64     |
| Turk, Uygur             | TUY | Turkey                       | 10 | 44    | 81    | 59     |
| Turkmen                 | TR  | Turkmenistan                 | 23 | 37.57 | 58.23 | 65, 62 |
| Ukrainian               | UR  | Ukraine                      | 20 | 50.26 | 30.31 | 65     |
| Yemenite                | YM  | Yemen                        | 74 | 15.55 | 48.51 | 17, 63 |

**Table S2**

Prediction accuracy for populations and sub populations

| <b>Populations</b>  | <b>Prediction accuracy (%)</b> |                  |
|---------------------|--------------------------------|------------------|
|                     | <b>&lt;250km</b>               | <b>&lt;500km</b> |
| Abkhazian           | 96                             | 96               |
| Adygei              | 12                             | 82               |
| Afghanistan Pashtun | 100                            | 100              |
| Afghanistan Tajik   | 80                             | 100              |
| Afghanistan Turkmen | 25                             | 100              |
| Armenian            | 86                             | 86               |
| Azeri               | 0                              | 13               |
| Balochi             | 100                            | 100              |
| Bedouin             | 38                             | 42               |
| Brahui              | 100                            | 100              |
| Bulgarian           | 100                            | 100              |
| Burusho             | 100                            | 100              |
| Egyptian            | 89                             | 89               |
| Ethiopian A         | 100                            | 100              |
| Ethiopian O         | 100                            | 100              |
| Ethiopian T         | 100                            | 100              |
| Georgian            | 79                             | 82               |
| Hazara Afghanistan  | 60                             | 60               |
| Hazara Pakistan     | 4                              | 4                |
| Iranian             | 56                             | 83               |
| Kurds               | 0                              | 0                |
| Lebanese            | 23                             | 43               |
| Lezgin              | 86                             | 100              |
| Makrani             | 96                             | 96               |
| Moldovian           | 14                             | 57               |
| Mongolian           | 100                            | 100              |
| Pakistani Kalash    | 100                            | 100              |
| Palestinian         | 67                             | 95               |

Reconstructing Druze population history

---

|                         |     |     |
|-------------------------|-----|-----|
| Pathan                  | 96  | 100 |
| Romanian                | 93  | 100 |
| Russian, Balkar         | 91  | 91  |
| Russian, Chechen        | 100 | 100 |
| Russian, Kumyk          | 71  | 100 |
| Russian, Mordovian      | 93  | 100 |
| Russian, Moscow         | 67  | 67  |
| Russian, Nogai          | 6   | 6   |
| Russian, North Ossetian | 100 | 100 |
| Russian, Tatar          | 0   | 0   |
| Saudi                   | 75  | 75  |
| Sindhi                  | 96  | 96  |
| Syrian                  | 94  | 100 |
| Tajikistan              | 61  | 96  |
| Turk                    | 89  | 89  |
| Turkey Aydin            | 65  | 80  |
| Turkey Bishkek          | 19  | 44  |
| Turkey Istanbul         | 80  | 80  |
| Turkey Kayseri          | 91  | 91  |
| Turkmen                 | 87  | 87  |
| Ukrainian               | 75  | 100 |
| Uygur                   | 100 | 100 |
| Yemen                   | 28  | 38  |

---

**Table S3**

GPS predictions of more recent and ancient origins for Druze individuals

| Ind ID    | Recent origin |          | Ancient origin |          |
|-----------|---------------|----------|----------------|----------|
|           | GPS Lat       | GPS Long | GPS Lat        | GPS Long |
| HGDP00557 | 34.72         | 40.54    | 36.50          | 43.56    |
| HGDP00569 | 36.13         | 40.58    | 37.56          | 42.85    |
| HGDP00581 | 36.40         | 41.08    | 38.30          | 44.15    |
| HGDP00594 | 35.87         | 41.08    | 37.03          | 43.38    |
| HGDP00558 | 38.04         | 43.29    | 38.65          | 44.26    |
| HGDP00582 | 35.32         | 39.60    | 37.51          | 42.81    |
| HGDP00595 | 36.87         | 41.12    | 38.65          | 42.50    |
| HGDP00559 | 36.59         | 41.19    | 38.32          | 43.86    |
| HGDP00571 | 39.38         | 44.40    | 39.70          | 44.86    |
| HGDP00583 | 34.95         | 40.46    | 36.86          | 43.43    |
| HGDP00597 | 35.95         | 41.41    | 37.00          | 43.78    |
| HGDP00572 | 34.61         | 39.29    | 33.41          | 38.07    |
| HGDP00584 | 35.56         | 39.75    | 37.28          | 42.38    |
| HGDP00598 | 35.38         | 40.51    | 36.75          | 43.05    |
| HGDP00561 | 34.88         | 39.81    | 36.85          | 42.93    |
| HGDP00573 | 36.25         | 40.61    | 38.31          | 42.56    |
| HGDP00599 | 38.26         | 42.94    | 39.28          | 43.85    |
| HGDP00562 | 35.95         | 40.32    | 37.61          | 42.54    |
| HGDP00574 | 38.22         | 43.06    | 38.74          | 44.22    |
| HGDP00586 | 34.31         | 38.80    | 32.89          | 38.09    |
| HGDP00600 | 35.43         | 41.16    | 36.67          | 43.76    |
| HGDP00563 | 35.59         | 41.28    | 36.98          | 43.82    |
| HGDP00575 | 36.71         | 40.98    | 38.82          | 42.77    |
| HGDP00587 | 35.97         | 39.87    | 37.86          | 41.14    |
| HGDP00601 | 33.84         | 40.20    | 36.11          | 43.68    |
| HGDP00565 | 34.42         | 40.24    | 36.61          | 43.27    |
| HGDP00577 | 34.81         | 39.70    | 33.91          | 38.88    |
| HGDP00564 | 34.39         | 40.13    | 35.85          | 43.88    |
| HGDP00576 | 33.77         | 37.70    | 32.18          | 35.67    |
| HGDP00588 | 36.60         | 41.21    | 37.83          | 43.42    |
| HGDP00602 | 36.12         | 41.33    | 37.17          | 43.58    |
| HGDP00566 | 32.58         | 39.43    | 31.01          | 38.38    |
| HGDP00578 | 34.12         | 39.31    | 32.27          | 38.46    |
| HGDP00590 | 35.62         | 41.38    | 36.77          | 43.72    |
| HGDP00604 | 38.19         | 43.00    | 39.07          | 43.65    |
| HGDP00567 | 33.82         | 39.11    | 31.92          | 38.45    |
| HGDP00579 | 31.78         | 40.48    | 26.53          | 43.25    |
| HGDP00591 | 36.49         | 40.90    | 39.03          | 43.47    |
| HGDP00560 | 38.43         | 43.41    | 39.17          | 44.57    |
| HGDP00568 | 38.36         | 43.27    | 38.83          | 44.33    |



|           |       |       |       |       |
|-----------|-------|-------|-------|-------|
| HGDP00580 | 36.05 | 40.19 | 38.08 | 41.86 |
| HGDP00606 | 33.82 | 39.40 | 32.32 | 38.74 |

---

**Table S6**

Summary of ancient and modern individuals used in the supervised admixture analysis.

| Sample ID | Population label        | Source                  |
|-----------|-------------------------|-------------------------|
| I1584     | Anatolia (Chalcolithic) | Lazaridis et al. (2016) |
| I0707     | Anatolia (Neolithic)    | Lazaridis et al. (2016) |
| I0708     | Anatolia (Neolithic)    | Lazaridis et al. (2016) |
| I0709     | Anatolia (Neolithic)    | Lazaridis et al. (2016) |
| I0723     | Anatolia (Neolithic)    | Lazaridis et al. (2016) |
| I0724     | Anatolia (Neolithic)    | Lazaridis et al. (2016) |
| I0726     | Anatolia (Neolithic)    | Lazaridis et al. (2016) |
| I0727     | Anatolia (Neolithic)    | Lazaridis et al. (2016) |
| I0736     | Anatolia (Neolithic)    | Lazaridis et al. (2016) |
| I0744     | Anatolia (Neolithic)    | Lazaridis et al. (2016) |
| I0745     | Anatolia (Neolithic)    | Lazaridis et al. (2016) |
| I0746     | Anatolia (Neolithic)    | Lazaridis et al. (2016) |
| I1096     | Anatolia (Neolithic)    | Lazaridis et al. (2016) |
| I1097     | Anatolia (Neolithic)    | Lazaridis et al. (2016) |
| I1098     | Anatolia (Neolithic)    | Lazaridis et al. (2016) |
| I1099     | Anatolia (Neolithic)    | Lazaridis et al. (2016) |
| I1100     | Anatolia (Neolithic)    | Lazaridis et al. (2016) |
| I1101     | Anatolia (Neolithic)    | Lazaridis et al. (2016) |
| I1102     | Anatolia (Neolithic)    | Lazaridis et al. (2016) |
| I1103     | Anatolia (Neolithic)    | Lazaridis et al. (2016) |
| I1579     | Anatolia (Neolithic)    | Lazaridis et al. (2016) |
| I1580     | Anatolia (Neolithic)    | Lazaridis et al. (2016) |
| I1581     | Anatolia (Neolithic)    | Lazaridis et al. (2016) |
| I1583     | Anatolia (Neolithic)    | Lazaridis et al. (2016) |
| I1585     | Anatolia (Neolithic)    | Lazaridis et al. (2016) |
| I1407     | Armenia (Chalcolithic)  | Lazaridis et al. (2016) |
| I1409     | Armenia (Chalcolithic)  | Lazaridis et al. (2016) |
| I1631     | Armenia (Chalcolithic)  | Lazaridis et al. (2016) |
| I1632     | Armenia (Chalcolithic)  | Lazaridis et al. (2016) |
| I1633     | Armenia (Bronze Age)    | Lazaridis et al. (2016) |
| I1634     | Armenia (Chalcolithic)  | Lazaridis et al. (2016) |
| I1635     | Armenia (Bronze Age)    | Lazaridis et al. (2016) |
| I1656     | Armenia (Bronze Age)    | Lazaridis et al. (2016) |
| I1658     | Armenia (Bronze Age)    | Lazaridis et al. (2016) |
| RISE396   | Armenia (Bronze Age)    | Lazaridis et al. (2016) |
| RISE397   | Armenia (Bronze Age)    | Lazaridis et al. (2016) |

|           |                      |                         |
|-----------|----------------------|-------------------------|
| RISE407   | Armenia (Bronze Age) | Lazaridis et al. (2016) |
| RISE408   | Armenia (Bronze Age) | Lazaridis et al. (2016) |
| RISE412   | Armenia (Bronze Age) | Lazaridis et al. (2016) |
| RISE413   | Armenia (Bronze Age) | Lazaridis et al. (2016) |
| RISE416   | Armenia (Bronze Age) | Lazaridis et al. (2016) |
| RISE423   | Armenia (Bronze Age) | Lazaridis et al. (2016) |
| I0861     | Levant (Natufian)    | Lazaridis et al. (2016) |
| I0867     | Levant (Neolithic)   | Lazaridis et al. (2016) |
| I1069     | Levant (Natufian)    | Lazaridis et al. (2016) |
| I1072     | Levant (Natufian)    | Lazaridis et al. (2016) |
| I1414     | Levant (Neolithic)   | Lazaridis et al. (2016) |
| I1415     | Levant (Neolithic)   | Lazaridis et al. (2016) |
| I1416     | Levant (Neolithic)   | Lazaridis et al. (2016) |
| I1679     | Levant (Neolithic)   | Lazaridis et al. (2016) |
| I1685     | Levant (Natufian)    | Lazaridis et al. (2016) |
| I1687     | Levant (Natufian)    | Lazaridis et al. (2016) |
| I1690     | Levant (Natufian)    | Lazaridis et al. (2016) |
| I1699     | Levant (Neolithic)   | Lazaridis et al. (2016) |
| I1700     | Levant (Neolithic)   | Lazaridis et al. (2016) |
| I1701     | Levant (Neolithic)   | Lazaridis et al. (2016) |
| I1704     | Levant (Neolithic)   | Lazaridis et al. (2016) |
| I1705     | Levant (Bronze Age)  | Lazaridis et al. (2016) |
| I1706     | Levant (Bronze Age)  | Lazaridis et al. (2016) |
| I1707     | Levant (Neolithic)   | Lazaridis et al. (2016) |
| I1709     | Levant (Neolithic)   | Lazaridis et al. (2016) |
| I1710     | Levant (Neolithic)   | Lazaridis et al. (2016) |
| I1727     | Levant (Neolithic)   | Lazaridis et al. (2016) |
| I1730     | Levant (Bronze Age)  | Lazaridis et al. (2016) |
| HGDP00607 | Bedouin              | HGDP                    |
| HGDP00608 | Bedouin              | HGDP                    |
| HGDP00609 | Bedouin              | HGDP                    |
| HGDP00610 | Bedouin              | HGDP                    |
| HGDP00611 | Bedouin              | HGDP                    |
| HGDP00612 | Bedouin              | HGDP                    |
| HGDP00613 | Bedouin              | HGDP                    |
| HGDP00614 | Bedouin              | HGDP                    |
| HGDP00615 | Bedouin              | HGDP                    |
| HGDP00616 | Bedouin              | HGDP                    |
| HGDP00618 | Bedouin              | HGDP                    |
| HGDP00619 | Bedouin              | HGDP                    |
| HGDP00620 | Bedouin              | HGDP                    |
| HGDP00622 | Bedouin              | HGDP                    |
| HGDP00623 | Bedouin              | HGDP                    |
| HGDP00624 | Bedouin              | HGDP                    |
| HGDP00625 | Bedouin              | HGDP                    |

---

|           |         |      |
|-----------|---------|------|
| HGDP00626 | Bedouin | HGDP |
| HGDP00627 | Bedouin | HGDP |
| HGDP00628 | Bedouin | HGDP |
| HGDP00629 | Bedouin | HGDP |
| HGDP00630 | Bedouin | HGDP |
| HGDP00631 | Bedouin | HGDP |
| HGDP00632 | Bedouin | HGDP |
| HGDP00634 | Bedouin | HGDP |
| HGDP00635 | Bedouin | HGDP |
| HGDP00636 | Bedouin | HGDP |
| HGDP00637 | Bedouin | HGDP |
| HGDP00638 | Bedouin | HGDP |
| HGDP00639 | Bedouin | HGDP |
| HGDP00640 | Bedouin | HGDP |
| HGDP00641 | Bedouin | HGDP |
| HGDP00642 | Bedouin | HGDP |
| HGDP00643 | Bedouin | HGDP |
| HGDP00644 | Bedouin | HGDP |
| HGDP00645 | Bedouin | HGDP |
| HGDP00646 | Bedouin | HGDP |
| HGDP00647 | Bedouin | HGDP |
| HGDP00648 | Bedouin | HGDP |
| HGDP00649 | Bedouin | HGDP |
| HGDP00650 | Bedouin | HGDP |
| HGDP00651 | Bedouin | HGDP |
| HGDP00653 | Bedouin | HGDP |
| HGDP00654 | Bedouin | HGDP |
| HGDP00701 | Bedouin | HGDP |
| HGDP00557 | Druze   | HGDP |
| HGDP00558 | Druze   | HGDP |
| HGDP00559 | Druze   | HGDP |
| HGDP00560 | Druze   | HGDP |
| HGDP00561 | Druze   | HGDP |
| HGDP00562 | Druze   | HGDP |
| HGDP00563 | Druze   | HGDP |
| HGDP00564 | Druze   | HGDP |
| HGDP00565 | Druze   | HGDP |
| HGDP00566 | Druze   | HGDP |
| HGDP00567 | Druze   | HGDP |
| HGDP00568 | Druze   | HGDP |
| HGDP00569 | Druze   | HGDP |
| HGDP00571 | Druze   | HGDP |
| HGDP00572 | Druze   | HGDP |
| HGDP00573 | Druze   | HGDP |
| HGDP00574 | Druze   | HGDP |
| HGDP00575 | Druze   | HGDP |
| HGDP00576 | Druze   | HGDP |

---

|           |             |      |
|-----------|-------------|------|
| HGDP00577 | Druze       | HGDP |
| HGDP00578 | Druze       | HGDP |
| HGDP00579 | Druze       | HGDP |
| HGDP00580 | Druze       | HGDP |
| HGDP00581 | Druze       | HGDP |
| HGDP00582 | Druze       | HGDP |
| HGDP00583 | Druze       | HGDP |
| HGDP00584 | Druze       | HGDP |
| HGDP00586 | Druze       | HGDP |
| HGDP00587 | Druze       | HGDP |
| HGDP00588 | Druze       | HGDP |
| HGDP00590 | Druze       | HGDP |
| HGDP00591 | Druze       | HGDP |
| HGDP00594 | Druze       | HGDP |
| HGDP00595 | Druze       | HGDP |
| HGDP00597 | Druze       | HGDP |
| HGDP00598 | Druze       | HGDP |
| HGDP00599 | Druze       | HGDP |
| HGDP00600 | Druze       | HGDP |
| HGDP00601 | Druze       | HGDP |
| HGDP00602 | Druze       | HGDP |
| HGDP00604 | Druze       | HGDP |
| HGDP00606 | Druze       | HGDP |
| Lebanon1  | Lebanese    | HGDP |
| Lebanon2  | Lebanese    | HGDP |
| Lebanon3  | Lebanese    | HGDP |
| Lebanon4  | Lebanese    | HGDP |
| Lebanon5  | Lebanese    | HGDP |
| Lebanon6  | Lebanese    | HGDP |
| Lebanon7  | Lebanese    | HGDP |
| Lebanon8  | Lebanese    | HGDP |
| HGDP00675 | Palestinian | HGDP |
| HGDP00676 | Palestinian | HGDP |
| HGDP00677 | Palestinian | HGDP |
| HGDP00678 | Palestinian | HGDP |
| HGDP00679 | Palestinian | HGDP |
| HGDP00680 | Palestinian | HGDP |
| HGDP00682 | Palestinian | HGDP |
| HGDP00683 | Palestinian | HGDP |
| HGDP00684 | Palestinian | HGDP |
| HGDP00685 | Palestinian | HGDP |
| HGDP00686 | Palestinian | HGDP |
| HGDP00687 | Palestinian | HGDP |
| HGDP00688 | Palestinian | HGDP |
| HGDP00689 | Palestinian | HGDP |
| HGDP00690 | Palestinian | HGDP |
| HGDP00691 | Palestinian | HGDP |

---

|           |             |      |
|-----------|-------------|------|
| HGDP00692 | Palestinian | HGDP |
| HGDP00693 | Palestinian | HGDP |
| HGDP00694 | Palestinian | HGDP |
| HGDP00696 | Palestinian | HGDP |
| HGDP00697 | Palestinian | HGDP |
| HGDP00698 | Palestinian | HGDP |
| HGDP00699 | Palestinian | HGDP |
| HGDP00700 | Palestinian | HGDP |
| HGDP00722 | Palestinian | HGDP |
| HGDP00723 | Palestinian | HGDP |
| HGDP00724 | Palestinian | HGDP |
| HGDP00725 | Palestinian | HGDP |
| HGDP00726 | Palestinian | HGDP |
| HGDP00727 | Palestinian | HGDP |
| HGDP00729 | Palestinian | HGDP |
| HGDP00730 | Palestinian | HGDP |
| HGDP00731 | Palestinian | HGDP |
| HGDP00732 | Palestinian | HGDP |
| HGDP00733 | Palestinian | HGDP |
| HGDP00734 | Palestinian | HGDP |
| HGDP00735 | Palestinian | HGDP |
| HGDP00736 | Palestinian | HGDP |
| HGDP00737 | Palestinian | HGDP |
| HGDP00738 | Palestinian | HGDP |
| HGDP00739 | Palestinian | HGDP |
| HGDP00740 | Palestinian | HGDP |
| HGDP00741 | Palestinian | HGDP |
| HGDP00744 | Palestinian | HGDP |
| HGDP00745 | Palestinian | HGDP |
| HGDP00746 | Palestinian | HGDP |
| syria1    | Syrians     | HGDP |
| syria2    | Syrians     | HGDP |
| syria3    | Syrians     | HGDP |
| syria4    | Syrians     | HGDP |
| syria5    | Syrians     | HGDP |
| syria6    | Syrians     | HGDP |
| syria7    | Syrians     | HGDP |
| syria8    | Syrians     | HGDP |
| syria9    | Syrians     | HGDP |
| syria10   | Syrians     | HGDP |
| syria298  | Syrians     | HGDP |
| syria361  | Syrians     | HGDP |
| syria461  | Syrians     | HGDP |
| syria464  | Syrians     | HGDP |
| syria485  | Syrians     | HGDP |
| syria520  | Syrians     | HGDP |

---



**Table S7**

| Population ID | Population | Source              |
|---------------|------------|---------------------|
| iran1         | Iranian    | Behar et al. (2010) |
| iran2         | Iranian    | Behar et al. (2010) |
| iran3         | Iranian    | Behar et al. (2010) |
| iran4         | Iranian    | Behar et al. (2010) |
| iran5         | Iranian    | Behar et al. (2010) |
| iran6         | Iranian    | Behar et al. (2010) |
| iran7         | Iranian    | Behar et al. (2010) |
| iran8         | Iranian    | Behar et al. (2010) |
| iran9         | Iranian    | Behar et al. (2010) |
| iran10        | Iranian    | Behar et al. (2010) |
| iran11        | Iranian    | Behar et al. (2010) |
| iran12        | Iranian    | Behar et al. (2010) |
| iran13        | Iranian    | Behar et al. (2010) |
| iran14        | Iranian    | Behar et al. (2010) |
| iran15        | Iranian    | Behar et al. (2010) |
| iran16        | Iranian    | Behar et al. (2010) |
| iran17        | Iranian    | Behar et al. (2010) |
| iran18        | Iranian    | Behar et al. (2010) |
| iran19        | Iranian    | Behar et al. (2010) |
| iran20        | Iranian    | Behar et al. (2010) |
| HGDP00611     | Bedouin    | HGDP                |
| HGDP00623     | Bedouin    | HGDP                |
| HGDP00634     | Bedouin    | HGDP                |
| HGDP00645     | Bedouin    | HGDP                |
| HGDP00612     | Bedouin    | HGDP                |
| HGDP00624     | Bedouin    | HGDP                |
| HGDP00635     | Bedouin    | HGDP                |
| HGDP00646     | Bedouin    | HGDP                |
| HGDP00613     | Bedouin    | HGDP                |
| HGDP00636     | Bedouin    | HGDP                |
| HGDP00647     | Bedouin    | HGDP                |
| HGDP00614     | Bedouin    | HGDP                |
| HGDP00626     | Bedouin    | HGDP                |
| HGDP00637     | Bedouin    | HGDP                |
| HGDP00648     | Bedouin    | HGDP                |
| HGDP00615     | Bedouin    | HGDP                |
| HGDP00627     | Bedouin    | HGDP                |
| HGDP00638     | Bedouin    | HGDP                |
| HGDP00649     | Bedouin    | HGDP                |
| HGDP00616     | Bedouin    | HGDP                |
| HGDP00628     | Bedouin    | HGDP                |
| HGDP00639     | Bedouin    | HGDP                |
| HGDP00650     | Bedouin    | HGDP                |
| HGDP00629     | Bedouin    | HGDP                |



---

|           |           |                     |
|-----------|-----------|---------------------|
| HGDP00640 | Bedouin   | HGDP                |
| HGDP00651 | Bedouin   | HGDP                |
| HGDP00607 | Bedouin   | HGDP                |
| HGDP00619 | Bedouin   | HGDP                |
| HGDP00631 | Bedouin   | HGDP                |
| HGDP00642 | Bedouin   | HGDP                |
| HGDP00653 | Bedouin   | HGDP                |
| HGDP00641 | Bedouin   | HGDP                |
| HGDP00643 | Bedouin   | HGDP                |
| HGDP00654 | Bedouin   | HGDP                |
| HGDP00644 | Bedouin   | HGDP                |
| HGDP00701 | Bedouin   | HGDP                |
| HGDP00610 | Bedouin   | HGDP                |
| HGDP00622 | Bedouin   | HGDP                |
| HGDP00625 | Bedouin   | HGDP                |
| HGDP00608 | Bedouin   | HGDP                |
| HGDP00620 | Bedouin   | HGDP                |
| HGDP00632 | Bedouin   | HGDP                |
| HGDP00618 | Bedouin   | HGDP                |
| HGDP00630 | Bedouin   | HGDP                |
| HGDP00609 | Bedouin   | HGDP                |
| Egypt1    | Egyptian  | Behar et al. (2010) |
| Egypt2    | Egyptian  | Behar et al. (2010) |
| Egypt3    | Egyptian  | Behar et al. (2010) |
| Egypt4    | Egyptian  | Behar et al. (2010) |
| Egypt5    | Egyptian  | Behar et al. (2010) |
| Egypt6    | Egyptian  | Behar et al. (2010) |
| Egypt7    | Egyptian  | Behar et al. (2010) |
| Egypt8    | Egyptian  | Behar et al. (2010) |
| Egypt9    | Egyptian  | Behar et al. (2010) |
| Egypt10   | Egyptian  | Behar et al. (2010) |
| Egypt11   | Egyptian  | Behar et al. (2010) |
| Egypt12   | Egyptian  | Behar et al. (2010) |
| Jordan444 | Jordanian | Behar et al. (2010) |
| Jordan608 | Jordanian | Behar et al. (2010) |
| Jordan307 | Jordanian | Behar et al. (2010) |
| Jordan646 | Jordanian | Behar et al. (2010) |
| Jordan543 | Jordanian | Behar et al. (2010) |
| Jordan214 | Jordanian | Behar et al. (2010) |
| Jordan503 | Jordanian | Behar et al. (2010) |
| Jordan384 | Jordanian | Behar et al. (2010) |
| Jordan305 | Jordanian | Behar et al. (2010) |
| Jordan445 | Jordanian | Behar et al. (2010) |
| Jordan387 | Jordanian | Behar et al. (2010) |
| Jordan62  | Jordanian | Behar et al. (2010) |
| Jordan382 | Jordanian | Behar et al. (2010) |
| Jordan603 | Jordanian | Behar et al. (2010) |

---

---

|           |             |                     |
|-----------|-------------|---------------------|
| Jordan426 | Jordanian   | Behar et al. (2010) |
| Jordan502 | Jordanian   | Behar et al. (2010) |
| Jordan485 | Jordanian   | Behar et al. (2010) |
| Jordan546 | Jordanian   | Behar et al. (2010) |
| Jordan563 | Jordanian   | Behar et al. (2010) |
| Jordan560 | Jordanian   | Behar et al. (2010) |
| HGDP00693 | Palestinian | HGDP                |
| HGDP00683 | Palestinian | HGDP                |
| HGDP00682 | Palestinian | HGDP                |
| HGDP00694 | Palestinian | HGDP                |
| HGDP00725 | Palestinian | HGDP                |
| HGDP00736 | Palestinian | HGDP                |
| HGDP00684 | Palestinian | HGDP                |
| HGDP00696 | Palestinian | HGDP                |
| HGDP00727 | Palestinian | HGDP                |
| HGDP00738 | Palestinian | HGDP                |
| HGDP00685 | Palestinian | HGDP                |
| HGDP00739 | Palestinian | HGDP                |
| HGDP00686 | Palestinian | HGDP                |
| HGDP00699 | Palestinian | HGDP                |
| HGDP00731 | Palestinian | HGDP                |
| HGDP00700 | Palestinian | HGDP                |
| HGDP00732 | Palestinian | HGDP                |
| HGDP00744 | Palestinian | HGDP                |
| HGDP00722 | Palestinian | HGDP                |
| HGDP00733 | Palestinian | HGDP                |
| HGDP00745 | Palestinian | HGDP                |
| HGDP00723 | Palestinian | HGDP                |
| HGDP00734 | Palestinian | HGDP                |
| HGDP00746 | Palestinian | HGDP                |
| HGDP00724 | Palestinian | HGDP                |
| HGDP00735 | Palestinian | HGDP                |
| HGDP00740 | Palestinian | HGDP                |
| HGDP00726 | Palestinian | HGDP                |
| HGDP00737 | Palestinian | HGDP                |
| tur52     | Turk        | Behar et al. (2010) |
| tur67     | Turk        | Behar et al. (2010) |
| tur84     | Turk        | Behar et al. (2010) |
| tur110    | Turk        | Behar et al. (2010) |
| tur124    | Turk        | Behar et al. (2010) |
| tur139    | Turk        | Behar et al. (2010) |
| tur154    | Turk        | Behar et al. (2010) |
| tur170    | Turk        | Behar et al. (2010) |
| tur182    | Turk        | Behar et al. (2010) |
| tur197    | Turk        | Behar et al. (2010) |
| tur210    | Turk        | Behar et al. (2010) |
| tur222    | Turk        | Behar et al. (2010) |

---

---

|           |          |                     |
|-----------|----------|---------------------|
| tur236    | Turk     | Behar et al. (2010) |
| tur262    | Turk     | Behar et al. (2010) |
| tur277    | Turk     | Behar et al. (2010) |
| tur306    | Turk     | Behar et al. (2010) |
| tur2      | Turk     | Behar et al. (2010) |
| tur20     | Turk     | Behar et al. (2010) |
| tur37     | Turk     | Behar et al. (2010) |
| arm3      | Armenian | Behar et al. (2010) |
| arm12     | Armenian | Behar et al. (2010) |
| arm21     | Armenian | Behar et al. (2010) |
| arm4      | Armenian | Behar et al. (2010) |
| arm13     | Armenian | Behar et al. (2010) |
| arm23     | Armenian | Behar et al. (2010) |
| arm5      | Armenian | Behar et al. (2010) |
| arm6      | Armenian | Behar et al. (2010) |
| arm26     | Armenian | Behar et al. (2010) |
| arm7      | Armenian | Behar et al. (2010) |
| arm17     | Armenian | Behar et al. (2010) |
| arm8      | Armenian | Behar et al. (2010) |
| arm14     | Armenian | Behar et al. (2010) |
| arm9      | Armenian | Behar et al. (2010) |
| arm18     | Armenian | Behar et al. (2010) |
| arm10     | Armenian | Behar et al. (2010) |
| arm19     | Armenian | Behar et al. (2010) |
| arm11     | Armenian | Behar et al. (2010) |
| arm20     | Armenian | Behar et al. (2010) |
| HGDP00557 | Druze    | HGDP                |
| HGDP00569 | Druze    | HGDP                |
| HGDP00581 | Druze    | HGDP                |
| HGDP00594 | Druze    | HGDP                |
| HGDP00558 | Druze    | HGDP                |
| HGDP00582 | Druze    | HGDP                |
| HGDP00595 | Druze    | HGDP                |
| HGDP00559 | Druze    | HGDP                |
| HGDP00571 | Druze    | HGDP                |
| HGDP00583 | Druze    | HGDP                |
| HGDP00597 | Druze    | HGDP                |
| HGDP00572 | Druze    | HGDP                |
| HGDP00584 | Druze    | HGDP                |
| HGDP00598 | Druze    | HGDP                |
| HGDP00561 | Druze    | HGDP                |
| HGDP00573 | Druze    | HGDP                |
| HGDP00599 | Druze    | HGDP                |
| HGDP00562 | Druze    | HGDP                |
| HGDP00574 | Druze    | HGDP                |
| HGDP00586 | Druze    | HGDP                |
| HGDP00600 | Druze    | HGDP                |

---

---

|           |             |                     |
|-----------|-------------|---------------------|
| HGDP00563 | Druze       | HGDP                |
| HGDP00575 | Druze       | HGDP                |
| HGDP00587 | Druze       | HGDP                |
| HGDP00601 | Druze       | HGDP                |
| HGDP00565 | Druze       | HGDP                |
| HGDP00577 | Druze       | HGDP                |
| HGDP00564 | Druze       | HGDP                |
| HGDP00576 | Druze       | HGDP                |
| HGDP00588 | Druze       | HGDP                |
| HGDP00602 | Druze       | HGDP                |
| HGDP00566 | Druze       | HGDP                |
| HGDP00578 | Druze       | HGDP                |
| HGDP00590 | Druze       | HGDP                |
| HGDP00604 | Druze       | HGDP                |
| HGDP00567 | Druze       | HGDP                |
| HGDP00579 | Druze       | HGDP                |
| HGDP00591 | Druze       | HGDP                |
| HGDP00560 | Druze       | HGDP                |
| HGDP00568 | Druze       | HGDP                |
| HGDP00580 | Druze       | HGDP                |
| HGDP00606 | Druze       | HGDP                |
| mg65      | Georgian    | Behar et al. (2010) |
| mg20      | Georgian    | Behar et al. (2010) |
| mg43      | Georgian    | Behar et al. (2010) |
| mg5       | Georgian    | Behar et al. (2010) |
| mg34      | Georgian    | Behar et al. (2010) |
| mg68      | Georgian    | Behar et al. (2010) |
| mg54      | Georgian    | Behar et al. (2010) |
| mg64      | Georgian    | Behar et al. (2010) |
| mg22      | Georgian    | Behar et al. (2010) |
| mg47      | Georgian    | Behar et al. (2010) |
| mg27      | Georgian    | Behar et al. (2010) |
| mg23      | Georgian    | Behar et al. (2010) |
| mg49      | Georgian    | Behar et al. (2010) |
| mg40      | Georgian    | Behar et al. (2010) |
| mg51      | Georgian    | Behar et al. (2010) |
| mg62      | Georgian    | Behar et al. (2010) |
| mg31      | Georgian    | Behar et al. (2010) |
| mg61      | Georgian    | Behar et al. (2010) |
| mg70      | Georgian    | Behar et al. (2010) |
| mg72      | Georgian    | Behar et al. (2010) |
| HGDP00675 | Palestinian | HGDP                |
| HGDP00687 | Palestinian | HGDP                |
| HGDP00697 | Palestinian | HGDP                |
| HGDP00729 | Palestinian | HGDP                |
| HGDP00741 | Palestinian | HGDP                |
| HGDP00676 | Palestinian | HGDP                |

---

---

|           |             |      |
|-----------|-------------|------|
| HGDP00688 | Palestinian | HGDP |
| HGDP00698 | Palestinian | HGDP |
| HGDP00730 | Palestinian | HGDP |
| HGDP00677 | Palestinian | HGDP |
| HGDP00689 | Palestinian | HGDP |
| HGDP00678 | Palestinian | HGDP |
| HGDP00690 | Palestinian | HGDP |
| HGDP00679 | Palestinian | HGDP |
| HGDP00691 | Palestinian | HGDP |
| HGDP00680 | Palestinian | HGDP |
| HGDP00692 | Palestinian | HGDP |

---

**Supplementary Dataset File 1**

Y chromosomal haplogroup counts

**Supplementary Dataset File 2**

MtDNA chromosomal haplogroup counts
